# Supplementary material
Source: PubMed Central journal article supplement (PMC3214660)
Supplement: NIHMS323931-supplement-1.pdf [file NIHMS323931-supplement-1.pdf]

# **Fluorinated Cyclooxygenase-2 Inhibitors as Agents for PET Imaging of Inflammation and Cancer**

Md. Jashim Uddin,<sup>1</sup> Brenda C. Crews,<sup>1</sup> Kebreab Ghebreselasie,<sup>1</sup> Imran Huda,<sup>1</sup> Philip J. Kingsley<sup>1</sup>, M. Sib Ansari,<sup>2</sup> Mohammed N. Tantawy,<sup>2</sup> J. Jeffery Reese<sup>3</sup>, and Lawrence J. Marnett<sup>1</sup>

<sup>1</sup>A. B. Hancock, Jr., Memorial Laboratory for Cancer Research, Department of Biochemistry, Chemistry and Pharmacology, Vanderbilt Institute of Chemical Biology, Center for Molecular Toxicology and Vanderbilt-Ingram Cancer Center, Vanderbilt University School of Medicine, Nashville, Tennessee 37232-0146, U.S.A.

<sup>2</sup>Department of Radiology and Radiological Sciences, and Vanderbilt Institute of Imaging Sciences; <sup>3</sup>Division of Neonatology, Department of Pediatrics, Vanderbilt University Medical Center, Nashville, Tennessee 37232, U.S.A.

## **Supplementary Information**

### **• General**

Silica gel column chromatography was performed using Sorbent silica gel standard grade, porosity 60Å, particle size 32-63 µm (230 x 450 mesh), surface area 500 – 600 m<sup>2</sup>/g, bulk density 0.4 g/mL, pH range 6.5 – 7.5, purchased from Sorbent Technologies (Atlanta, GA). All other reagents, purchased from the Aldrich Chemical Company (Milwaukee, WI), were used without further purification. <sup>1</sup>H NMR was taken on a Bruker AV-I

console operating at 400.13 MHz. Experimental conditions included 2048 x 512 data matrix, 13 ppm sweep width, recycle delay of 1.5 seconds and 4 scans per increment. The data were processed using squared sinebell window function, symmetrized, and displayed in magnitude mode. Multiplicity-edited HSQC experiments were acquired using a 2048 x 256 data matrix, a  $J(\text{C-H})$  value of 145 Hz which resulted in a multiplicity selection delay of 34 ms, a recycle delay of 1.5 seconds and 16 scans per increment along with GARP decoupling on  $^{13}\text{C}$  during the acquisition time (150 ms). The data were processed using a  $p/2$  shifted squared sine window function and displayed with  $\text{CH}/\text{CH}_3$  signals phased positive and  $\text{CH}_2$  signals phased negative.  $J_1(\text{C-H})$  filtered HMBC experiments were acquired using a 2048 x 256 data matrix, a  $J(\text{C-H})$  value of 9 Hz for detection of long range couplings resulting in an evolution delay of 55ms,  $J_1(\text{C-H})$  filter delay of 145 Hz (34 ms) for the suppression of one-bond couplings, a recycle delay of 1.5 seconds and 128 scans per increment. The HMBC data were processed using a  $p/2$  shifted squared sine window function and displayed in magnitude mode. Mass spectrometric analyses were performed on a ThermoElectron Surveyor pump TSQ 7000 instrument in ESI positive or negative ion mode. The radiochemical yield was determined by TLC using a radioactivity scanner (Bioscan, Inc., Washington, D.C.).

### • Synthesis of Fluorinated Indomethacin Derivatives

Our laboratory has shown that conversion of carboxylic acid-containing NSAIDs (i.e., indomethacin) into neutral amide derivatives is a facile method to generate a structurally diverse series of selective COX-2 inhibitors (1). We used this method to develop fluorinated compounds that bind to COX-2 *in vitro* and *in vivo*. Indomethacin derivatives having a single amide linkage were synthesized by coupling of indomethacin with 4-fluoroethylamine or 4-fluorobenzylamine using ethyl-1-[3-(dimethylamino)propyl]-3-ethylcarbodiimide (EDCI), 1-hydroxybenzotriazole hydrate (HOBt), and *N,N*-diisopropylethylamine (DIEA) in *N,N*-dimethylformamide (DMF) to afford conjugates **1** and **2**. Alternatively, reaction of indomethacin with mono BOC-protected alkyldiamine in the presence of EDCI followed by treatment with HCl (gas) gave indolylamidoalkylamine hydrochloride salts. Treatment of these salts with triethylamine (TEA) followed by conjugation with either *p*-fluorobenzoylchloride or *p*-fluorobenzenesulfonylchloride afforded fluoro-compounds **3—6**.

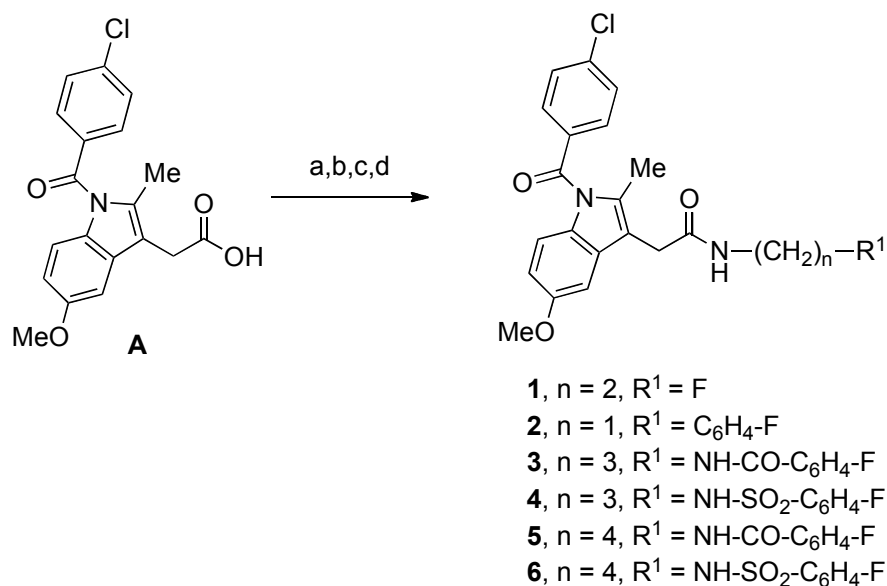

**Scheme 1s.** (a)  $H_2N-(CH_2)_2-F$  or  $H_2N-CH_2-C_6H_4-F$ , EDCI, DIEA, HOBt, DMF, 25 °C, 16 h, (b)  $H_2N-(CH_2)_n-NH-BOC$  ( $n = 3$  or  $4$ ), EDCI, HOBt, DIEA, DMF, 25 °C, 16 h, (c) HCl (gas),  $CH_2Cl_2$ , 0–25 °C 1 h, (d) Cl-CO- $C_6H_4-F$  or Cl-SO<sub>2</sub>- $C_6H_4-F$ , TEA,  $CH_2Cl_2$ , 25 °C, 16 h.

***N*-(2-Fluoroethyl)-2-{1-(*p*-chlorobenzoyl)-5-methoxy-2-methyl-1*H*-indol-3-yl}acetamide (1). General procedure.**

To a stirred solution of indomethacin (3.57 g, 10 mmol) in *N,N*-dimethylformamide (DMF) was added 2-fluoroethylamine (0.63 g, 10 mmol), 1-hydroxybenzotriazole hydrate (HOBt) (2.02 g, 15 mmol), *N,N*-diisopropylethylamine (DIEA) (3.88 g, 30 mmol), ethyl-1-[3-(dimethylamino)propyl]-3-ethylcarbodiimide hydrochloride (EDCI) (2.10 g, 11 mmol) at 25 °C. The resultant mixture was stirred for 16 h at 25 °C. The solvent was removed, water (100 mL) was added and extracted with EtOAc (3 X 75 mL). The organic layer was collected, washed with water and evaporated *in vacuo*. The crude product was purified using silica gel column chromatography (35 : 7 : 1,  $CHCl_3$  : MeOH :



NH<sub>4</sub>OH) to give compound **1** as yellow solid (3.0 g, 75%). <sup>1</sup>H NMR (500 MHz, DMSO-*d*<sub>6</sub>) δ 2.23 (s, 3H, CH<sub>3</sub>), 3.34-3.40 (m, 2H, CH<sub>2</sub>), 3.68 (s, 2H, CH<sub>2</sub>CO), 3.78 (s, 3H, OCH<sub>3</sub>), 4.25-4.31 (m, 2H, CH<sub>2</sub>), 6.70 (dd, *J* = 9.0, 2.2 Hz, 1H, indolyl H-6), 6.95 (d, *J* = 9.0 Hz, 1H, indolyl H-7), 7.08 (d, *J* = 2.4 Hz, 1H, indolyl H-4), 7.67 (d, *J* = 8.8 Hz, 2H, 4-chlorobenzoyl H-3, H-5), 7.83 (d, *J* = 8.8 Hz, 2H, 4-chlorobenzoyl H-2, H-6), 8.49-8.54 (m, 1H, NHCOCH<sub>2</sub>). Mass (ESI) *m/z* [M+H]<sup>+</sup> calcd 403.11; found 403.18.

**2-{1-(4-Chlorobenzoyl)-5-methoxy-2-methyl-1*H*-indol-3-yl}-*N*-(4-fluorobenzyl)acetamide (2).** Yellow solid (77%). <sup>1</sup>H NMR (500 MHz, DMSO-*d*<sub>6</sub>) δ 2.22 (s, 3H, CH<sub>3</sub>), 3.65 (s, 2H, CH<sub>2</sub>CO), 3.79 (s, 3H, OCH<sub>3</sub>), 4.24 (d, *J* = 6 Hz, 2H, CH<sub>2</sub>Ar), 6.72 (dd, *J* = 9.0, 2.2 Hz, 1H, indolyl H-6), 6.96 (d, *J* = 9.0 Hz, 1H, indolyl H-7), 7.10 (d, *J* = 2.4 Hz, 1H, indolyl H-4), 7.16 (d, *J* = 8.4 Hz, 2H, 4-fluorobenzyl H-3, H-5), 7.36 (d, *J* = 8.4 Hz, 2H, 4-fluorobenzyl H-2, H-6), 7.68 (d, *J* = 8.8 Hz, 2H, 4-chlorobenzoyl H-3, H-5), 7.85 (d, *J* = 8.8 Hz, 2H, 4-chlorobenzoyl H-2, H-6), 8.47-8.52 (m, 1H, NHCOCH<sub>2</sub>). Mass (ESI) *m/z* [M+H]<sup>+</sup> calcd 465.13; found 465.20.

***t*-Butyl 4-[2-{1-(4-chlorobenzoyl)-5-methoxy-2-methyl-1*H*-indol-3-yl}acetamido]propylcarbamate. General Procedure.** To a stirred solution of indomethacin (3.57 g, 10 mmol) in DMF was added *N*-BOC propylenediamine (5.0 g, 30 mmol), HOBT (2.02 g, 15 mmol), DIPEA (3.88 g, 30 mmol), EDCI (2.10 g, 11 mmol) at 25 °C. The resultant mixture was stirred for 16 h at 25 °C. Removal of solvent *in vacuo* afforded a residue, to which 100 mL water was added and extracted with EtOAc (3 X 75 mL). The combined organic layers were dried over Na<sub>2</sub>SO<sub>4</sub>, concentrated *in vacuo* and

the product was crystallized from *n*-hexane as yellow crystals (3.5 g, 64%). <sup>1</sup>H NMR (500 MHz, DMSO-*d*<sub>6</sub>) δ 1.31 (s, 9H, C(CH<sub>3</sub>)<sub>3</sub>), 2.02-2.07 (m, 2H, CCH<sub>2</sub>C) 2.23 (s, 3H, CH<sub>3</sub>), 3.39-3.48 (m, 2H, CCH<sub>2</sub>), 3.57-3.66 (m, 2H, CH<sub>2</sub>C), 3.73 (s, 2H, CH<sub>2</sub>CO), 3.76 (s, 3H, OCH<sub>3</sub>), 6.69 (dd, *J* = 9, 2.5 Hz, 1H, indolyl H-6), 6.72-6.77 (m, 1H, NHCOO), 6.94 (d, *J* = 9 Hz, 1H, indolyl H-7), 7.19 (d, *J* = 2.5 Hz, 1H, indolyl H-4), 7.63 (d, *J* = 8.7 Hz, 2H, 4-chlorobenzoyl H-3, H-5), 7.67 (d, *J* = 8.7 Hz, 2H, 4-chlorobenzoyl H-2, H-6), 8.01-8.04 (m, 1H, NHCCH<sub>2</sub>). Mass (ESI): *m/z* [M+H]<sup>+</sup> calcd 514.20; found 514.29.

***t*-Butyl 4-[2-{1-(4-chlorobenzoyl)-5-methoxy-2-methyl-1*H*-indol-3-**

**yl}acetamido]butylcarbamate.** Yellow solid (60%). <sup>1</sup>H NMR (500 MHz, DMSO-*d*<sub>6</sub>) δ 1.25-1.45 (m, 13H, C(CH<sub>3</sub>)<sub>3</sub>), 2.21 (s, 3H, CH<sub>3</sub>), 2.42-2.48 (m, 4H, CCH<sub>2</sub>CH<sub>2</sub>C), 2.82-2.88 (m, 2H, CCCCH<sub>2</sub>), 3.00-3.05 (m, 2H, CH<sub>2</sub>CCC), 3.45 (s, 2H, CH<sub>2</sub>CO), 3.75 (s, 3H, OCH<sub>3</sub>), 6.68 (dd, *J* = 9, 2.5 Hz, 1H, indolyl H-6), 6.73-6.76 (m, 1H, NHCOO), 6.935 (d, *J* = 9 Hz, 1H, indolyl H-7), 7.185 (d, *J* = 2.5 Hz, 1H, indolyl H-4), 7.63 (d, *J* = 8.7 Hz, 2H, 4-chlorobenzoyl H-3, H-5), 7.675 (d, *J* = 8.7 Hz, 2H, 4-chlorobenzoyl H-2, H-6), 7.98-8.01 (m, 1H, NHCCH<sub>2</sub>). Mass (ESI) *m/z* M<sup>+</sup> calcd 528.22; found 528.32.

***N*-(4-Aminopropyl)-2-{1-(*p*-chlorobenzoyl)-5-methoxy-2-methyl-1*H*-indol-3-**

**yl}acetamide hydrochloride. General Procedure.** HCl (gas) was passed through a solution of *t*-butyl 4-[2-{1-(4-chlorobenzoyl)-5-methoxy-2-methyl-1*H*-indol-3-yl}acetamido]propylcarbamate (1.0 g) in CH<sub>2</sub>Cl<sub>2</sub> (10 mL) for 2 h at 25 °C. Removal of solvent *in vacuo* afforded a yellow residue, to which *n*-hexane was added (20 mL) and stirred for 30 min to make good slurry, which was filtered to afford the desired *N*-(4-

aminopropyl)-2-[1-(4-chlorobenzoyl)-5-methoxy-2-methyl-1*H*-indol-3-yl]acetamide hydrochloride as brown solid (0.83 g, 99%). <sup>1</sup>H NMR (500 MHz, DMSO-*d*<sub>6</sub>) δ 1.60-1.65 (m, 2H, CCH<sub>2</sub>C), 2.25 (s, 3H, CH<sub>3</sub>), 2.78-2.98 (m, 2H, CH<sub>2</sub>C), 3.34-3.45 (m, 2H, CCH<sub>2</sub>), 3.55 (s, 2H, CH<sub>2</sub>CO), 3.74 (s, 3H, OCH<sub>3</sub>), 6.53 (dd, *J* = 9, 2.4 Hz, 1H, indolyl H-6), 6.82 (d, *J* = 9 Hz, 1H, indolyl H-7), 7.12 (d, *J* = 2.4 Hz, 1H, indolyl H-4), 7.48 (d, *J* = 8.8 Hz, 2H, 4-chlorobenzoyl H-3, H-5), 7.65 (d, *J* = 8.7 Hz, 2H, 4-chlorobenzoyl H-2, H-6), 8.26 (br s, 3H, NH<sub>3</sub><sup>+</sup>), 8.54-8.60 (m, 1H, NHC(=O)CH<sub>2</sub>). Mass (ESI) *m/z* (M-Cl)<sup>+</sup> calcd for 414.15; found 414.22.

***N*-(4-Aminobutyl)-2-{1-(4-chlorobenzoyl)-5-methoxy-2-methyl-1*H*-indol-3-yl}acetamide hydrochloride.** Yellow solid (95%). <sup>1</sup>H NMR (500 MHz, DMSO-*d*<sub>6</sub>) δ 1.45-1.51 (m, 2H, CCH<sub>2</sub>CC), 1.54-1.58 (m, 2H, CCCH<sub>2</sub>C), 2.22 (s, 3H, CH<sub>3</sub>), 2.70-2.78 (m, 2H, CCCCH<sub>2</sub>), 3.03-3.07 (m, 2H, CH<sub>2</sub>CCC), 3.50 (s, 2H, CH<sub>2</sub>CO), 3.75 (s, 3H, OCH<sub>3</sub>), 6.68 (dd, *J* = 9, 2.4 Hz, 1H, indolyl H-6), 6.91 (d, *J* = 9 Hz, 1H, indolyl H-7), 7.15 (d, *J* = 2.4 Hz, 1H, indolyl H-4), 7.63 (d, *J* = 8.7 Hz, 2H, 4-chlorobenzoyl H-3, H-5), 7.68 (d, *J* = 8.7 Hz, 2H, 4-chlorobenzoyl H-2, H-6), 7.95-8.08 (br s, 3H, NH<sub>3</sub><sup>+</sup>), 8.24-8.27 (m, 1H, NHC(=O)CH<sub>2</sub>). Mass (ESI) *m/z* (M-Cl)<sup>+</sup> calcd 428.17; found 428.28.

**2-{1-(4-Chlorobenzoyl)-5-methoxy-2-methyl-1*H*-indol-3-yl}-*N*-(3-(4-fluorobenzamido)propyl)acetamide (3).** **General Procedure.** To a stirred solution of *N*-(4-aminopropyl)-2-[1-(4-chlorobenzoyl)-5-methoxy-2-methyl-1*H*-indol-3-yl]acetamide hydrochloride (178 mg, 0.37 mmol) in CH<sub>2</sub>Cl<sub>2</sub> (4 mL) was added triethylamine (100 mg). The resultant solution was stirred for 5 min at room temperature.

After cooling to 0°C, 4-fluorobenzoyl chloride was added drop-by-drop while maintaining the reaction temperature < 10 °C. The reaction mixture was stirred for 12 h. Removal of solvent *in vacuo* afforded a residue. Water (10 mL) was added and extracted with EtOAc (3 X 10 mL). The combined organic layers were dried over Na<sub>2</sub>SO<sub>4</sub>. The solvent was removed completely. The residue was purified using silica gel column chromatography (35 : 7 : 1, CHCl<sub>3</sub> : MeOH : NH<sub>4</sub>OH) to give compound **3** as yellow solid (161 mg, 72%). <sup>1</sup>H NMR (500 MHz, DMSO-*d*<sub>6</sub>) δ 1.97-2.04 (m, 2H, CCH<sub>2</sub>C) 2.23 (s, 3H, CH<sub>3</sub>), 3.40-3.49 (m, 2H, CCH<sub>2</sub>), 3.58-3.67 (m, 2H, CH<sub>2</sub>C), 3.74 (s, 2H, CH<sub>2</sub>CO), 3.79 (s, 3H, OCH<sub>3</sub>), 6.72 (dd, *J* = 9, 2.5 Hz, 1H, indolyl H-6), 6.95 (d, *J* = 9 Hz, 1H, indolyl H-7), 7.20 (d, *J* = 2.5 Hz, 1H, indolyl H-4), 7.45 (d, *J* = 8.7 Hz, 2H, 4-fluorobenzoyl H-3, H-5), 7.64 (d, *J* = 8.7 Hz, 2H, 4-chlorobenzoyl H-3, H-5), 7.66 (d, *J* = 8.7 Hz, 2H, 4-chlorobenzoyl H-2, H-6), 7.86 (d, *J* = 8.7 Hz, 2H, 4-fluorobenzoyl H-2, H-6), 8.02-8.05 (m, 1H, NHCOCH<sub>2</sub>), 8.06-8.09 (m, 1H, NHCOAr). Mass (ESI) *m/z* [M+H]<sup>+</sup> calcd 536.17; found 536.24.

**2-{1-(4-Chlorobenzoyl)-5-methoxy-2-methyl-1*H*-indol-3-yl}-*N*-{3-(4-fluorophenylsulfonamido)propyl}acetamide (4).** Yellow solid (74%). <sup>1</sup>H NMR (500 MHz, DMSO-*d*<sub>6</sub>) δ 1.99-2.05 (m, 2H, CCH<sub>2</sub>C) 2.21 (s, 3H, CH<sub>3</sub>), 3.38-3.46 (m, 2H, CCH<sub>2</sub>), 3.60-3.67 (m, 2H, CH<sub>2</sub>C), 3.75 (s, 2H, CH<sub>2</sub>CO), 3.81 (s, 3H, OCH<sub>3</sub>), 6.76 (dd, *J* = 9, 2.5 Hz, 1H, indolyl H-6), 6.96 (d, *J* = 9 Hz, 1H, indolyl H-7), 7.21 (d, *J* = 2.5 Hz, 1H, indolyl H-4), 7.44 (d, *J* = 8.7 Hz, 2H, 4-fluorobenzenesulfonyl H-3, H-5), 7.63 (d, *J* = 8.7 Hz, 2H, 4-chlorobenzoyl H-3, H-5), 7.66 (d, *J* = 8.7 Hz, 2H, 4-chlorobenzoyl H-2, H-6), 7.87 (d, *J* = 8.7 Hz, 2H, 4-fluorobenzenesulfonyl H-2, H-6), 8.12-8.15 (m, 1H,

*NHCOCH*<sub>2</sub>), 8.26-8.29 (m, 1H, *NHSO*<sub>2</sub>Ar). Mass (ESI) *m/z* [M+H]<sup>+</sup> calcd 572.13; found 572.21.

**2-{1-(4-Chlorobenzoyl)-5-methoxy-2-methyl-1*H*-indol-3-yl}-*N*-{3-(4-fluorobenzamido)butyl}acetamide (5).** Yellow solid (67%). <sup>1</sup>H NMR (500 MHz, DMSO-*d*<sub>6</sub>) δ 1.45-1.54 (m, 4H, CCH<sub>2</sub>CH<sub>2</sub>C), 2.22 (s, 3H, CH<sub>3</sub>), 2.70-2.80 (m, 2H, CH<sub>2</sub>CCC), 3.04-3.11 (m, 2H, CCCCH<sub>2</sub>), 3.75 (s, 2H, CH<sub>2</sub>CO), 3.76 (s, 3H, OCH<sub>3</sub>), 6.70 (dd, *J* = 9, 2.4 Hz, 1H, indolyl H-6), 6.93 (d, *J* = 9 Hz, 1H, indolyl H-7), 7.19 (d, *J* = 2.4 Hz, 1H, indolyl H-4), 7.43 (d, *J* = 8.7 Hz, 2H, 4-fluorobenzoyl H-3, H-5), 7.63 (d, *J* = 8.7 Hz, 2H, 4-chlorobenzoyl H-3, H-5), 7.64 (d, *J* = 8.7 Hz, 2H, 4-chlorobenzoyl H-2, H-6), 7.87 (d, *J* = 8.7 Hz, 2H, 4-fluorobenzoyl H-2, H-6), 8.04-8.06 (m, 1H, *NHCOCH*<sub>2</sub>), 8.07-8.10 (m, 1H, *NHCO*Ar). Mass (ESI) *m/z* [M+H]<sup>+</sup> calcd 550.18; found 550.28.

**2-{1-(4-Chlorobenzoyl)-5-methoxy-2-methyl-1*H*-indol-3-yl}-*N*-{3-(4-fluorophenylsulfonamido)butyl}acetamide (6).** Yellow solid (69%). <sup>1</sup>H NMR (500 MHz, DMSO-*d*<sub>6</sub>) δ 1.47-1.56 (m, 4H, CCH<sub>2</sub>CH<sub>2</sub>C), 2.23 (s, 3H, CH<sub>3</sub>), 2.71-2.81 (m, 2H, CH<sub>2</sub>CCC), 3.05-3.10 (m, 2H, CCCCH<sub>2</sub>), 3.76 (s, 2H, CH<sub>2</sub>CO), 3.82 (s, 3H, OCH<sub>3</sub>), 6.77 (dd, *J* = 9, 2.5 Hz, 1H, indolyl H-6), 6.97 (d, *J* = 9 Hz, 1H, indolyl H-7), 7.22 (d, *J* = 2.5 Hz, 1H, indolyl H-4), 7.45 (d, *J* = 8.7 Hz, 2H, 4-fluorobenzenesulfonyl H-3, H-5), 7.64 (d, *J* = 8.7 Hz, 2H, 4-chlorobenzoyl H-3, H-5), 7.67 (d, *J* = 8.7 Hz, 2H, 4-chlorobenzoyl H-2, H-6), 7.88 (d, *J* = 8.7 Hz, 2H, 4-fluorobenzenesulfonyl H-2, H-6), 8.13-8.16 (m, 1H, *NHCOCH*<sub>2</sub>), 8.27-8.30 (m, 1H, *NHSO*<sub>2</sub>Ar). Mass (ESI) *m/z* [M+H]<sup>+</sup> calcd 586.15; found 586.24.

### • Synthesis Fluorinated Celecoxib Derivatives

A second set of fluorinated COX-2 ligands was generated based on a fluoromethyl or a SO<sub>2</sub>Me pharmacophore substitution on the selective COX-2 inhibitor, celecoxib. An ultrasonication-assisted Claisen condensation of 4-methylacetophenone with dimethyloxalate in the presence of sodium methoxide afforded methyl 2,4-dioxo-4-(*p*-tolyl)butanoate. Alternatively, the reaction of 4-methylacetophenone with succinic anhydride in the presence of lithium diisopropylamide (LDA) yielded 4,6-dioxo-6-(*p*-tolyl)hexanoic acid. The pyrazole intermediates were synthesized by condensation of 2,4-dioxo-4-(*p*-tolyl)butanoate or 4,6-dioxo-6-(*p*-tolyl)hexanoic acid with either *p*-methylsulfonylphenylhydrazine hydrochloride or *p*-sulfonylamidophenylhydrazine hydrochloride in reflux conditions. The 1,5-regioisomers were generated almost exclusively by carrying out the reaction in the presence of the hydrochloride salt of the substituted phenylhydrazine in refluxing methanol (2). When required, the 1,5-diarylpyrazoles were separated from the minor 1,3-diarylpyrazole isomers by flash chromatography. The pyrazole intermediates were reduced to the corresponding alcohols. Diethylaminosulfurtrifluoride (DAST) mediated fluorination of these alcohols gave the desired fluoro-compounds **7**–**10** in good yields.

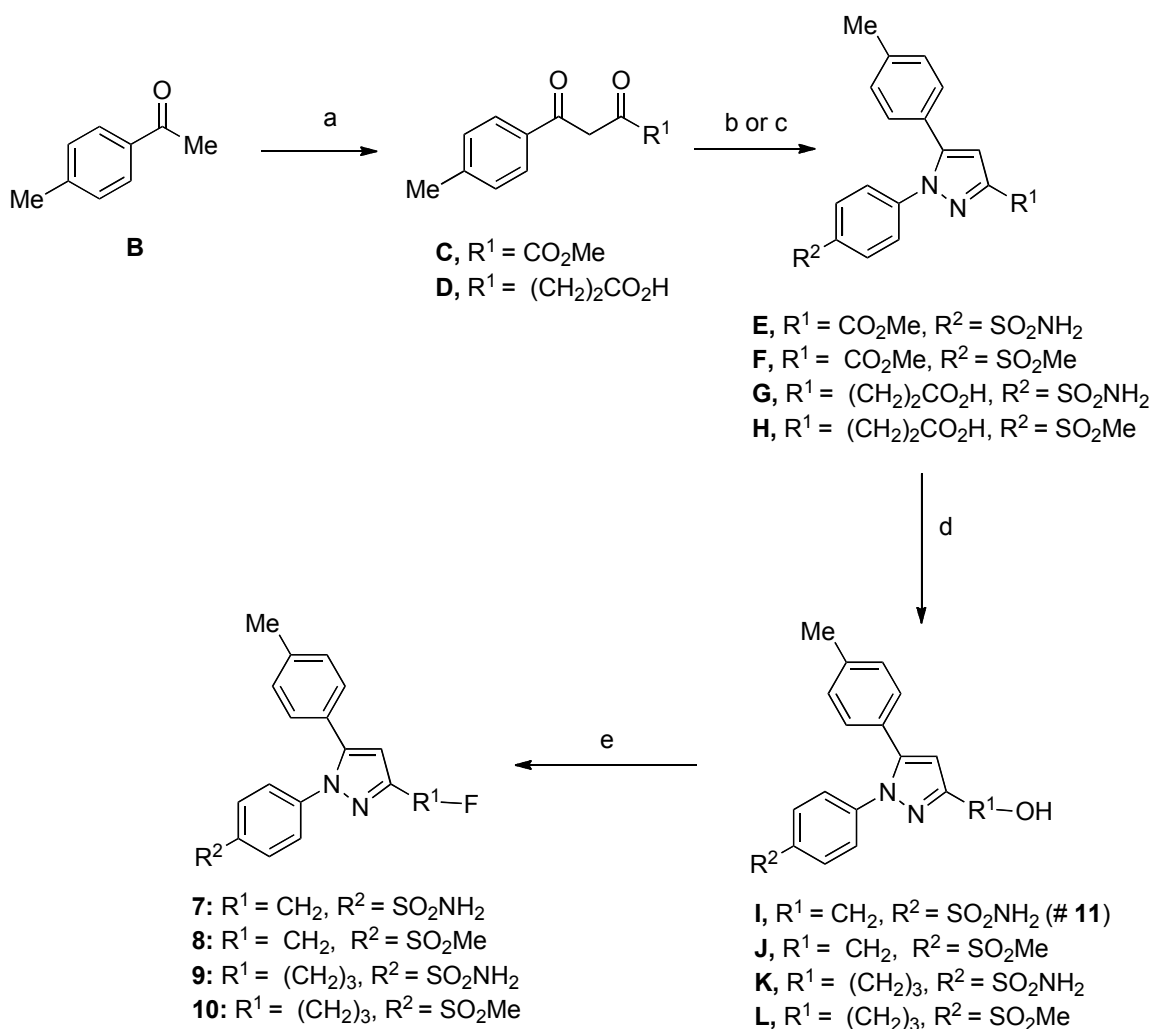

**Scheme 2s.** (a) Dimethyloxalate, 25 % NaOMe/MeOH, ultrasound, 45 °C, 16 h, or LDA, succinic anhydride, THF, -78 °C, (b) H<sub>2</sub>NSO<sub>2</sub>-C<sub>6</sub>H<sub>4</sub>-NH-NH<sub>2</sub>.HCl or MeSO<sub>2</sub>-C<sub>6</sub>H<sub>4</sub>-NH-NH<sub>2</sub>.HCl, MeOH, reflux 16 h, (c) H<sub>2</sub>NSO<sub>2</sub>-C<sub>6</sub>H<sub>4</sub>-NH-NH<sub>2</sub>.HCl or MeSO<sub>2</sub>-C<sub>6</sub>H<sub>4</sub>-NH-NH<sub>2</sub>.HCl, TEA, MeOH, Reflux 16 h, (d) LAH, THF, reflux 16 h, (e) DAST, CH<sub>2</sub>Cl<sub>2</sub>, 25 °C, 3 h.

#### Methyl 4-(4-methylphenyl)-2,4-dioxobutanoate (C), General Procedure:

To a stirred solution of dimethyl oxalate (4.70 g, 40 mmol) in MeOH (60 mL) was added 4-methylacetophenone (9.04 g, 40 mmol) followed by 25% NaOMe in MeOH (17 mL).

The reaction mixture was ultrasonicated with for 16 h at 45 °C. After cooling to room temperature, the reaction was poured into 1N HCl (125 mL) and cool to 0 °C. The solid formed was filtered, washed with cold water and dried to afford methyl 4-(4-methylphenyl)-2,4-dioxobutanoate as a yellow solid (7.93 g, 65 %). In DMSO this exists in the enol-form exclusively. <sup>1</sup>H NMR (400 MHz, DMSO-*d*<sub>6</sub>) δ 2.36 (s, 3H, CH<sub>3</sub>), 3.66 (s, 3H, CO<sub>2</sub>CH<sub>3</sub>), 6.76 (s, 1H, =CH), 6.82 (d, *J* = 8.5 Hz, 2H, 4-methylphenyl H-2, H-6), 7.35 (d, *J* = 8.5 Hz, 2H, 4-methylphenyl H-3, H-5), 16.28 [br s, 1H, OH (enol)]. Mass (ESI) *m/z* [M+H]<sup>+</sup> calcd 221.07; found 221.16.

#### **6-(4-Methylphenyl)-4,6-dioxohexanoic acid (D), General Procedure:**

To a stirred solution of *N,N*-diisopropylamine (5.05 g, 50 mmol) in THF (125 mL) was added a 1.6 M solution of *n*-butyl lithium in THF (31.25 mL, 50 mmol) at 0 °C under Argon. The reaction mixture was further cooled to -78 °C and stirred for 10 min at -78 °C followed by 4-methylacetophenone (12.8 g, 50 mmol) in THF (25 mL). The reaction mixture was stirred for 30 min at -78 °C. Then succinic anhydride (2.00 g, 20 mmol) in 50 mL THF was added and stirred for 1 h at -78 °C and 1 h at room temperature. The reaction was poured into 5% HCl (125 mL), then ether (100 mL) was added for extraction. The organic layer was separated and washed with 10% NaOH. The aqueous layer was acidified with 4N HCl, which was extracted with ether (3 X 100 mL). The combined organic layer was dried with Na<sub>2</sub>SO<sub>4</sub> and evaporated to dryness and the product **D** was recrystallized from ether as a yellow solid (11.76 g, 68 %). In DMSO this exists in the enol-form exclusively. <sup>1</sup>H NMR (400 MHz, DMSO-*d*<sub>6</sub>) δ 2.35 (s, 3H, CH<sub>3</sub>), 2.64-2.69 (m, 2H, CH<sub>2</sub>), 3.12-3.15 (m, 2H, CH<sub>2</sub>), 6.75 (s, 1H, =CH), 6.84 (d, *J* = 8.5 Hz,



2H, 4-methylphenyl H-2, H-6), 7.36 (d,  $J = 8.7$  Hz, 2H, 4-methylphenyl H-3, H-5), 12.35 [br s, 1H, COOH], 17.14 [br s, 1H, OH (enol)]. Mass (ESI)  $m/z$  [M-H]<sup>-</sup> calcd 233.09; found 233.22.

**Methyl 5-(4-methylphenyl)-1-(4-sulfonamidophenyl)-1H-pyrazole-3-carboxylate (E),**

**General Procedure:**

To a stirred solution of 6-(4-methylphenyl)-4,6-dioxohexanoic acid (2.05 g, 6 mmol) in EtOH (60 mL) was added 4-sulfonamidophenylhydrazine hydrochloride (1.5 mL, 6.1 mmol). The reaction mixture was refluxed for 24 h. After cooling to room temperature the solvent was removed in vacuo. The residue was purified using a silica gel column chromatography (7 : 3, Hexane : EtOAc) to give the title compound **E** as a pale yellow amorphous solid (2.37 g, 76 %). <sup>1</sup>H NMR (400 MHz, DMSO-*d*<sub>6</sub>) δ 2.34 (s, 3H, CH<sub>3</sub>), 3.90 (s, 3H, CO<sub>2</sub>CH<sub>3</sub>), 7.25 (s, 1H, =CH), 7.36 (d,  $J = 8.8$  Hz, 2H, 4-methylphenyl H-3, H-5), 7.50 (s, 2H, SO<sub>2</sub>NH<sub>2</sub>), 7.72 (d,  $J = 8.8$  Hz, 2H, 4-methylphenyl H-2, H-6), 7.75 (d,  $J = 8.6$  Hz, 2H, 4-sulfonylphenyl H-2, H-6), 7.83 (d,  $J = 8.6$  Hz, 2H, 4-sulfonylphenyl H-3, H-5). Mass (ESI)  $m/z$  [M+H]<sup>+</sup> calcd 372.09; found 372.18.

**Methyl 5-(4-methylphenyl)-1-(4-methylsulfonylphenyl)-1H-pyrazole-3-carboxylate**

**(F):**

Yellow solid (78 %).  $^1\text{H NMR}$  (400 MHz,  $\text{DMSO-}d_6$ )  $\delta$  2.35 (s, 3H,  $\text{CH}_3$ ), 3.26 (s, 2H,  $\text{SO}_2\text{CH}_3$ ), 3.90 (s, 3H,  $\text{CO}_2\text{CH}_3$ ), 7.25 (s, 1H, =CH), 7.37 (d,  $J = 8.5$  Hz, 2H, 4-methylphenyl H-3, H-5), 7.60 (d,  $J = 8.7$  Hz, 2H 4-methylsulfonylphenyl H-3, H-5), 7.75 (d,  $J = 8.8$  Hz, 2H, 4-methylphenyl H-2, H-6), 7.97 (d,  $J = 8.7$  Hz, 2H, 4-methylsulfonylphenyl H-2, H-6). Mass (ESI)  $m/z$   $[\text{M}+\text{H}]^+$  calcd 371.10; found 371.21.

**3-[1-(4-Sulfonamidophenyl)-5-(4-methylphenyl)-1H-pyrazol-3-yl]propanoic acid (G).**

A mixture of 6-(4-methylphenyl)-4,6-dioxohexanoic acid (20 mmol), 4-sulfonamidophenylhydrazine hydrochloride (20 mmol), and TEA (20 mmol) in MeOH (150 mL) was stirred at 25 °C for 16 h. The mixture was then concentrated *in vacuo* to a residue, which was partitioned between  $\text{Et}_2\text{O}$  (150 mL) and 5% aq HCl (150 mL). The ether layer was separated, washed with 5% aq HCl (2 X 40 mL), and brine (40 mL), dried ( $\text{Na}_2\text{SO}_4$ , 1 g), filtered and concentrated to a residue. The crude residue was purified using a silica gel gravity column chromatography (35 : 7 : 1 –  $\text{CHCl}_3$  : MeOH :  $\text{NH}_4\text{OH}$ ) to give 3-[1-(4-sulfonamidophenyl)-5-(4-methylphenyl)-1H-pyrazol-3-yl]propanoic acid (G) as a yellow solid (83 %).  $^1\text{H NMR}$  (400 MHz,  $\text{DMSO-}d_6$ )  $\delta$  2.37 (s, 3H,  $\text{CH}_3$ ), 2.65 (t,  $J = 8.0$  Hz, 2H,  $\text{CH}_2$ ), 2.87 (t,  $J = 8.0$  Hz, 2H,  $\text{CH}_2$ ), 6.26 (s, =CH), 7.36 (d,  $J = 8.8$  Hz, 2H, 4-methylphenyl H-3, H-5), 7.53 (s, 2H,  $\text{SO}_2\text{NH}_2$ ), 7.70 (d,  $J = 8.8$  Hz, 2H, 4-methylphenyl H-2, H-6), 7.75 (d,  $J = 8.9$  Hz, 2H, 4-sulfonamidophenyl H-2, H-6), 7.85 (d,  $J = 8.9$  Hz, 2H, 4-sulfonamidophenyl H-3, H-5), 10.40 (s, 1H,  $\text{CO}_2\text{H}$ ). Mass (ESI)  $(\text{M}-\text{H})^-$  calcd 384.11; found 384.18.

**3-[1-(4-Methylsulfonylphenyl)-5-(4-methylphenyl)-1H-pyrazol-3-yl]propanoic acid (H).**

Yellow solid (85 %). <sup>1</sup>H NMR (400 MHz, DMSO-*d*<sub>6</sub>) δ 2.32 (s, 3H, CH<sub>3</sub>), 2.65 (t, *J* = 8.0 Hz, 2H, CH<sub>2</sub>), 2.87 (t, *J* = 8.0 Hz, 2H, CH<sub>2</sub>), 3.23 (s, 3H, SO<sub>2</sub>CH<sub>3</sub>), 6.26 (s, =CH), 7.36 (d, *J* = 8.7 Hz, 2H, 4-methylphenyl H-3, H-5), 7.62 (d, *J* = 8.7 Hz, 2H 4-methylsulfonylphenyl H-3, H-5), 7.71 (d, *J* = 8.7 Hz, 2H, 4-methylphenyl H-2, H-6), 7.96 (d, *J* = 8.7 Hz, 2H, 4-methylsulfonylphenyl H-2, H-6), 10.40 (s, 1H, CO<sub>2</sub>H). Mass (ESI) (M-H)<sup>-</sup> calcd 383.11; found 383.32.

### **3-(Hydroxymethyl)-1-(4-sulfonamidophenyl)-5-(4-methylphenyl)-1H-pyrazole**

#### **(I, # 11), General Procedure:**

To a stirred solution of compound **E** (1.85 g, 5 mmol) in THF (100 mL) was added lithium aluminium hydride (0.3 g). The reaction mixture was refluxed for 16 h. After cooling to room temperature the reaction was quenched with H<sub>2</sub>O (50 mL) and extracted with EtOAc (3 x 100 mL). The combined organic layer was dried over anhydrous Na<sub>2</sub>SO<sub>4</sub> and evaporated. The residue was purified by a silica gel column chromatography (100% EtOAc) to afford the alcohol **I** (# 11) as a white solid (1.2 g, 69 %). <sup>1</sup>H NMR (400 MHz, DMSO-*d*<sub>6</sub>) δ 2.33 (s, 3H, CH<sub>3</sub>), 3.97 (t, *J* = 8.0 Hz, 1H, OH), 4.85 (d, *J* = 9.0 Hz, 2H, CH<sub>2</sub>), 7.24 (s, 1H, =CH), 7.39 (d, *J* = 8.8 Hz, 2H, 4-methylphenyl H-3, H-5), 7.52 (s, 2H, SO<sub>2</sub>NH<sub>2</sub>), 7.73 (d, *J* = 8.8 Hz, 2H, 4-methylphenyl H-2, H-6), 7.76 (d, *J* = 8.6 Hz, 2H, 4-sulfonamidophenyl H-2, H-6), 7.84 (d, *J* = 8.6 Hz, 2H, 4-sulfonamidophenyl H-3, H-5). Mass (ESI) *m/z* [M+H]<sup>+</sup> calcd 344.10; found 344.19.

### **3-(Hydroxymethyl)-1-(4-methylsulfonylphenyl)-5-(4-methylphenyl)-1H-pyrazole (J).**

White solid (69 %).  $^1\text{H}$  NMR (400 MHz,  $\text{DMSO-}d_6$ )  $\delta$  2.33 (s, 3H,  $\text{CH}_3$ ), 3.26 (s, 2H,  $\text{SO}_2\text{CH}_3$ ), 3.98 (t,  $J = 8.0$  Hz, 1H, OH), 4.81 (d,  $J = 9.0$  Hz, 2H,  $\text{CH}_2$ ), 7.25 (s, 1H, =CH), 7.35 (d,  $J = 8.8$  Hz, 2H, 4-methylphenyl H-3, H-5), 7.65 (d,  $J = 8.7$  Hz, 2H 4-methylsulfonylphenyl H-3, H-5), 7.73 (d,  $J = 8.8$  Hz, 2H, 4-methylphenyl H-2, H-6), 7.95 (d,  $J = 8.7$  Hz, 2H, 4-methylsulfonylphenyl H-2, H-6). Mass (ESI)  $m/z$   $[\text{M}+\text{H}]^+$  calcd 343.10; found 343.03.

**3-(3-Hydroxypropyl)-1-(4-sulfonamidophenyl)-5-(4-methylphenyl)-1H-pyrazole (K).**

White solid (76 %).  $^1\text{H}$  NMR (400 MHz,  $\text{DMSO-}d_6$ )  $\delta$  1.83 (m, 2H,  $\text{CH}_2$ ), 2.33 (s, 3H,  $\text{CH}_3$ ), 2.42 (m, 2H,  $\text{CH}_2$ ), 3.62 (m, 2H,  $\text{CH}_2$ ), 3.74 (m, 1H, OH), 7.24 (s, 1H, =CH), 7.42 (d,  $J = 8.8$  Hz, 2H, 4-methylphenyl H-3, H-5), 7.55 (s, 2H,  $\text{SO}_2\text{NH}_2$ ), 7.74 (d,  $J = 8.8$  Hz, 2H, 4-methylphenyl H-2, H-6), 7.73 (d,  $J = 8.5$  Hz, 2H, 4-sulfonamidophenyl H-2, H-6), 7.85 (d,  $J = 8.5$  Hz, 2H, 4-sulfonamidophenyl H-3, H-5). Mass (ESI)  $m/z$   $[\text{M}+\text{H}]^+$  calcd 372.13; found 372.20.

**3-(3-Hydroxypropyl)-1-(4-methylsulfonylphenyl)-5-(4-methylphenyl)-1H-pyrazole (L).**

White solid (70 %).  $^1\text{H}$  NMR (400 MHz,  $\text{DMSO-}d_6$ )  $\delta$  1.85 (m, 2H,  $\text{CH}_2$ ), 3.25 (s, 2H,  $\text{SO}_2\text{CH}_3$ ), 2.30 (s, 3H,  $\text{CH}_3$ ), 2.44 (m, 2H,  $\text{CH}_2$ ), 3.65 (m, 2H,  $\text{CH}_2$ ), 3.75 (m, 1H, OH), 7.25 (s, 1H, =CH), 7.33 (d,  $J = 8.7$  Hz, 2H, 4-methylphenyl H-3, H-5), 7.63 (d,  $J = 8.6$  Hz, 2H 4-methylsulfonylphenyl H-3, H-5), 7.75 (d,  $J = 8.7$  Hz, 2H, 4-methylphenyl H-2, H-6), 7.92 (d,  $J = 8.6$  Hz, 2H, 4-methylsulfonylphenyl H-2, H-6). Mass (ESI)  $m/z$   $[\text{M}+\text{H}]^+$  calcd 371.14; found 371.05.

**3-(Fluoromethyl)-1-(4-sulfonamidophenyl)-5-(4-methylphenyl)-1H-pyrazole (7),**

**General Procedure:**

To a stirred solution of alcohol **I** (1.72 g, 5 mmol) in CH<sub>2</sub>Cl<sub>2</sub> (100 mL) was added diethylaminosulfurtrifluoride (DAST) (0.82 g, 5 mmol). The reaction mixture was stirred for 16 h at room temperature. The reaction was quenched with H<sub>2</sub>O (50 mL) and extracted with CH<sub>2</sub>Cl<sub>2</sub> (3 x 50 mL). The combined organic layer was dried over anhydrous Na<sub>2</sub>SO<sub>4</sub> and evaporated. The residue was purified by a silica gel column chromatography (100% EtOAc) to afford the fluoride **I** as a white solid (1.3 g, 70 %). <sup>1</sup>H NMR (400 MHz, DMSO-*d*<sub>6</sub>) δ 2.30 (s, 3H, CH<sub>3</sub>), 5.45 (d, *J* = 14.0 Hz, 2H, CH<sub>2</sub>), 7.22 (s, 1H, =CH), 7.42 (d, *J* = 8.8 Hz, 2H, 4-methylphenyl H-3, H-5), 7.54 (s, 2H, SO<sub>2</sub>NH<sub>2</sub>), 7.74 (d, *J* = 8.8 Hz, 2H, 4-methylphenyl H-2, H-6), 7.77 (d, *J* = 8.6 Hz, 2H, 4-sulfonamidophenyl H-2, H-6), 7.86 (d, *J* = 8.6 Hz, 2H, 4-sulfonamidophenyl H-3, H-5). Mass (ESI) *m/z* [M+H]<sup>+</sup> calcd 346.09; found 346.17.

**3-(Fluoromethyl)-1-(4-methylsulfonylphenyl)-5-(4-methylphenyl)-1H-pyrazole (8).**

White solid (74 %). <sup>1</sup>H NMR (400 MHz, DMSO-*d*<sub>6</sub>) δ 2.32 (s, 3H, CH<sub>3</sub>), 3.27 (s, 2H, SO<sub>2</sub>CH<sub>3</sub>), 5.41 (d, *J* = 14.0 Hz, 2H, CH<sub>2</sub>), 7.23 (s, 1H, =CH), 7.34 (d, *J* = 8.8 Hz, 2H, 4-methylphenyl H-3, H-5), 7.64 (d, *J* = 8.7 Hz, 2H 4-methylsulfonylphenyl H-3, H-5), 7.74 (d, *J* = 8.8 Hz, 2H, 4-methylphenyl H-2, H-6), 7.97 (d, *J* = 8.7 Hz, 2H, 4-methylsulfonylphenyl H-2, H-6). Mass (ESI) *m/z* [M+H]<sup>+</sup> calcd 345.10; found 345.23.

**3-(3-Fluoropropyl)-1-(4-sulfonamidophenyl)-5-(4-methylphenyl)-1H-pyrazole (9).**

White solid (76 %).  $^1\text{H}$  NMR (400 MHz,  $\text{DMSO-}d_6$ )  $\delta$  1.83 (m, 2H,  $\text{CH}_2$ ), 2.33 (s, 3H,  $\text{CH}_3$ ), 2.42 (m, 2H,  $\text{CH}_2$ ), 3.82 (m, 2H,  $\text{CH}_2$ ), 7.24 (s, 1H, =CH), 7.42 (d,  $J = 8.8$  Hz, 2H, 4-methylphenyl H-3, H-5), 7.55 (s, 2H,  $\text{SO}_2\text{NH}_2$ ), 7.74 (d,  $J = 8.8$  Hz, 2H, 4-methylphenyl H-2, H-6), 7.73 (d,  $J = 8.5$  Hz, 2H, 4-sulfonamidophenyl H-2, H-6), 7.85 (d,  $J = 8.5$  Hz, 2H, 4-sulfonamidophenyl H-3, H-5). Mass (ESI)  $m/z$   $[\text{M}+\text{H}]^+$  calcd 374.13; found 372.22.

**3-(3-Fluoropropyl)-1-(4-methylsulfonylphenyl)-5-(4-methylphenyl)-1H-pyrazole (10).**

White solid (89 %).  $^1\text{H}$  NMR (400 MHz,  $\text{DMSO-}d_6$ )  $\delta$  1.88 (m, 2H,  $\text{CH}_2$ ), 3.28 (s, 2H,  $\text{SO}_2\text{CH}_3$ ), 2.34 (s, 3H,  $\text{CH}_3$ ), 2.48 (m, 2H,  $\text{CH}_2$ ), 3.85 (m, 2H,  $\text{CH}_2$ ), 7.25 (s, 1H, =CH), 7.36 (d,  $J = 8.7$  Hz, 2H, 4-methylphenyl H-3, H-5), 7.65 (d,  $J = 8.6$  Hz, 2H 4-methylsulfonylphenyl H-3, H-5), 7.74 (d,  $J = 8.7$  Hz, 2H, 4-methylphenyl H-2, H-6), 7.95 (d,  $J = 8.6$  Hz, 2H, 4-methylsulfonylphenyl H-2, H-6). Mass (ESI)  $m/z$   $[\text{M}+\text{H}]^+$  calcd 374.13; found 374.25.

• **Radiochemistry.**

The radiochemistry for compound **7** was performed using a fluorodetosylation strategy. The tosylate was generated from the corresponding alcohol using Ts<sub>2</sub>O. A microwave-assisted nucleophilic <sup>18</sup>F-fluorodetosylation reaction of the tosylate precursor using carrier-free K<sup>18</sup>F/Kryptofix 2.2.2. complex afforded compound [<sup>18</sup>F]-**7** in good radiochemical yield (25 %) and high purity (> 99 %)

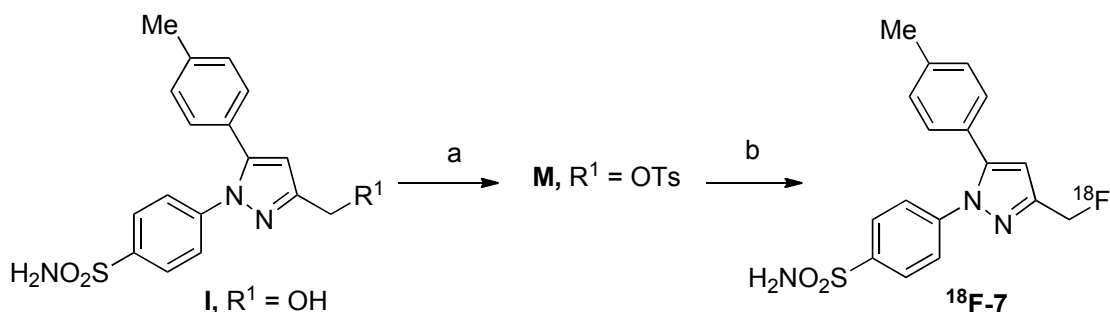

**Scheme 3s.** (a) Ts<sub>2</sub>O, pyridine, dimethylaminopyridine, CH<sub>2</sub>Cl<sub>2</sub>, 25 °C, 16 h; (b) K<sup>18</sup>F/Kryptofix2.2.2, dimethyl sulfoxide, microwave, 165 °C, 3 min.

**{1-(4-Sulfonamidophenyl)-5-(4-methylphenyl)-1H-pyrazol-3-yl}methyl 4-methylbenzenesulfonate (M).**

To a stirred solution of alcohol **I** (343 mg, 1 mmol) in CH<sub>2</sub>Cl<sub>2</sub> (100 mL) was added pyridine (250 mg), DMAP (35 mg) and Ts<sub>2</sub>O (417 mg, 1.3 mmol). The reaction mixture was stirred for 16 h at room temperature. The solvent was removed in vacuo. The residue was purified using a silica gel column chromatography (100% EtOAc) to afford the compound **M** as a white solid (470 mg, 65 %). <sup>1</sup>H NMR (400 MHz, DMSO-*d*<sub>6</sub>) δ 2.31 (s, 3H, CH<sub>3</sub>), 2.37 (s, 3H, CH<sub>3</sub>), 5.14 (s, 2H, CH<sub>2</sub>), 7.26 (s, 1H, =CH), 7.44 (d, *J* = 8.8 Hz, 2H, 4-methylphenyl H-3, H-5), 7.49 (d, *J* = 8.5 Hz, 2H, 4-methylbenzenesulfonate H-3, H-5), 7.55 (s, 2H, SO<sub>2</sub>NH<sub>2</sub>), 7.75 (d, *J* = 8.8 Hz, 2H, 4-methylphenyl H-2, H-6), 7.79 (d,

$J = 8.5$  Hz, 2H, 4-methylbenzenesulfonate H-2, H-6), 7.82 (d,  $J = 8.6$  Hz, 2H, 4-sulfonamidophenyl H-2, H-6), 7.88 (d,  $J = 8.6$  Hz, 2H, 4-sulfonamidophenyl H-3, H-5).  
Mass (ESI)  $m/z$   $[M+H]^+$  calcd 498.11; found 498.25.

### **Synthesis of radiotracer $^{18}\text{F}$ -7.**

The  $[^{18}\text{F}]$ -fluoride anion (27 mCi) was trapped (adsorbed) onto an anion ( $\text{K}_2\text{CO}_3$  contained) exchange resin (QMA-cartridge) and eluted with a solution of Kryptofix2.2.2 (15 mg) and  $\text{K}_2\text{CO}_3$  (15  $\mu\text{L}$ , 1 M) in  $\text{CH}_3\text{CN}/\text{H}_2\text{O}$  (8 : 2 v/v). The solvent was evaporated using a stream of nitrogen (5-8 psi, 20-30 mL/min) at 85 °C and co-evaporated to dryness with  $\text{CH}_3\text{CN}$  (2 X 200  $\mu\text{L}$ ) to remove the residual traces of water. A solution of tosylate precursor (6 mg) in anhydrous DMSO (1 mL) was added to the  $\text{K}^{18}\text{F}/\text{Kryptofix2.2.2}$  complex. The reaction mixture was microwaved at 165 °C for three times (1 min each) in a sealed vial. Purification of the crude product was accomplished using HPLC (Varian Microsorb C18, Dynamax 250 X 10, 8  $\mu\text{m}$ , EtOH/ $\text{NaH}_2\text{PO}_4$  (10 mM) 50 : 50, flow rate 5 mL/min,  $R_f$  26.7 min). The  $^{18}\text{F}$ -7 compound peak was collected and washed with Deionized- $\text{H}_2\text{O}$  (140 mL). The solvent was evaporated and the radiotracer was formulated with EtOH/Saline (1:9 v/v, 10 mL, 6 mCi, radiochemical yield 25%, radiochemical purity 99%).



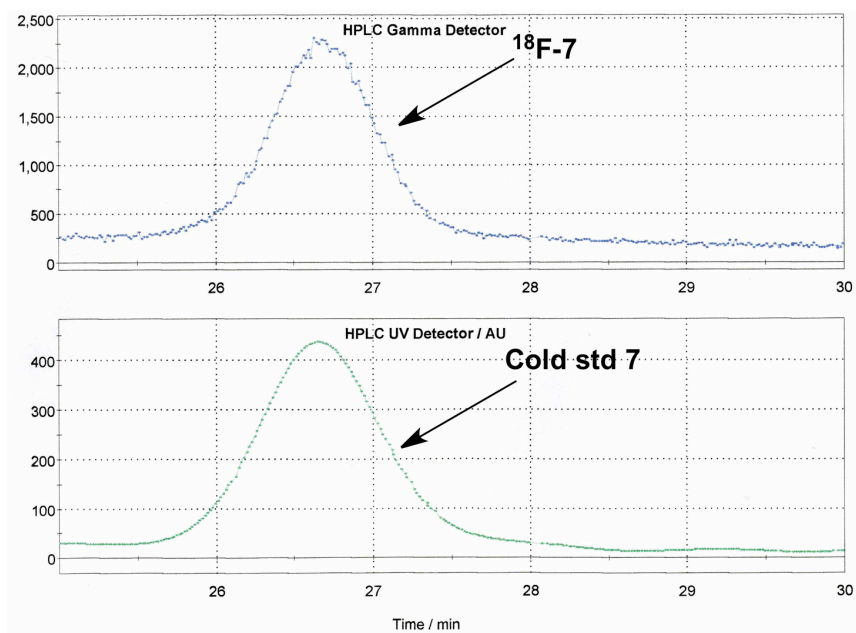

**Fig. S1.** Typical HPLC chromatogram of  $^{18}\text{F}$ -**7** compared with cold standard **7** as shown at  $R_f$  26.7 min. The HPLC was performed using a Varian Microsorb C18, Dynamax 250 X 10, 8  $\mu\text{m}$  column. The HPLC solvent was EtOH/ $\text{NaH}_2\text{PO}_4$  (10 mM) 50 : 50, flow rate 5 mL/min (isocratic elution).

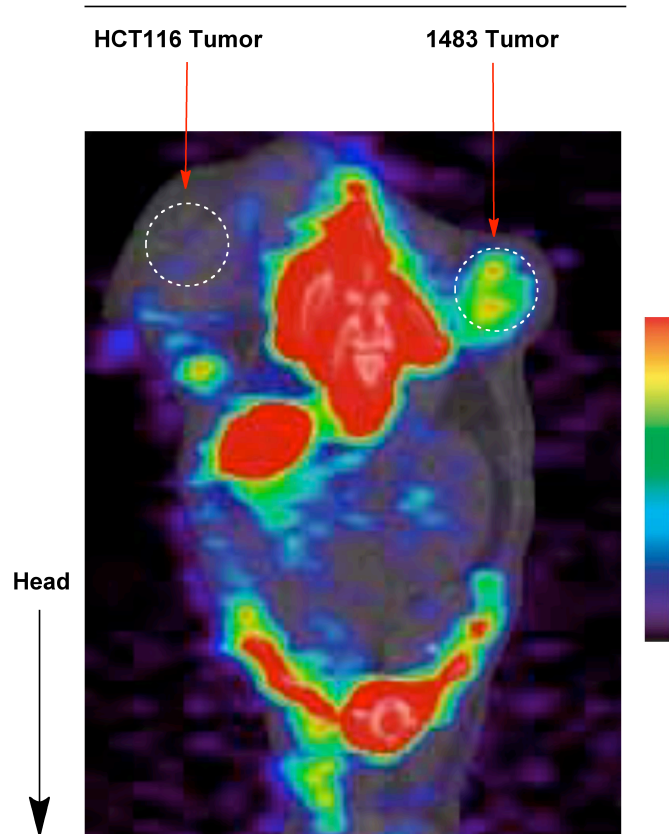

**Fig. S2.** *In vivo* PET imaging of HCT116 (COX-2-negative) or 1483 HNSCC (COX-2-positive) tumors by  $^{18}\text{F}$ -7. HCT116 cells were implanted at the right hip and 1483 cells were implanted in the left hip of the same animal with 3 weeks growth. The HCT116 and 1483 HNSCC tumor bearing female nude mice were dosed by retroorbital injection with compound  $^{18}\text{F}$ -7 (100  $\mu\text{L}$ ,  $\sim 350$   $\mu\text{Ci}$ , r.o.) under anesthesia. At 3 h post-injection, the animals were imaged in the microPET/CT instrument (30 min acquisition). The image depicts a female nude mouse with significant uptake of radiotracer in the COX-2 expressing HNSCC 1483 tumor (dotted circle) compared to minimal uptake in the COX-2 negative HCT116 tumor (dotted circle).

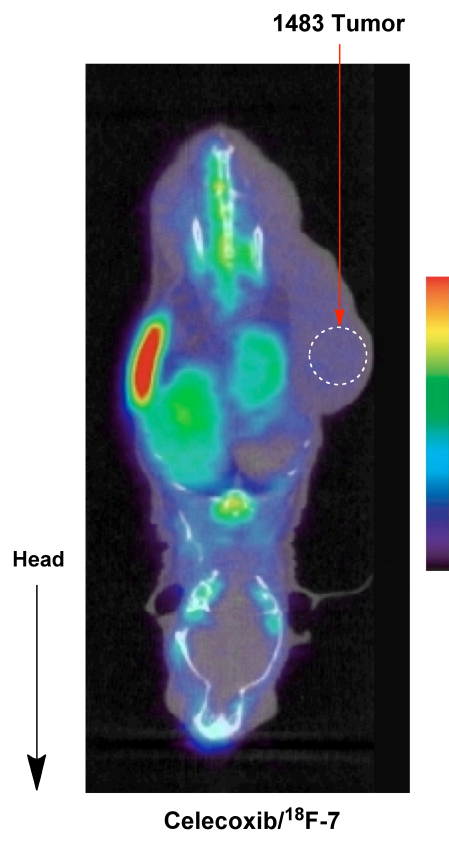

**Fig. S3.** *In vivo* PET imaging of celecoxib predosed mice with COX-2-expressing human 1483 HNSCC tumors by <sup>18</sup>F-7. Female nude mice bearing 1483 HNSCC xenografts were dosed by injection with celecoxib (20 mg/kg, i.p.) immediately prior to compound <sup>18</sup>F-7 (100  $\mu$ L,  $\sim$ 350  $\mu$ Ci, r.o.) under anesthesia. At 3 h post injection of compounds, the animals were imaged in the microPET/CT instrument (30 min acquisition). The image depicts a nude mouse with minimal <sup>18</sup>F-7 uptake in the 1483 tumor (dotted circle), indicating the efficient blockage of the COX-2 active site to radiotracer in the tumor.

## References

1. Kalgutkar AS, Marnett AB, Crews BC, Remmel RP, et al. Ester and Amide Derivatives of the Nonsteroidal Antiinflammatory Drug, Indomethacin, as Selective Cyclooxygenase-2 Inhibitors. *J Med Chem* 2000;43:2860–70.
2. Penning TD, Talley JJ, Bertenshaw SR, Carter JS, et al. Synthesis and Biological Evaluation of the 1,5-Diarylpyrazole Class of Cyclooxygenase-2 Inhibitors: Identification of 4-[5-(4-Methylphenyl)-3- (trifluoromethyl)-1H-pyrazol-1-yl]benzenesulfonamide (SC-58635, Celecoxib). *J Med Chem* 1997;40:1347-75.
